# Supplementary material for: Design of Cr–Ba-doped γ-Ga2O3 persistent luminescence nanoparticles for ratiometric temperature sensing and encryption information transfer
Source: Royal Society of Chemistry journal article supplement (doi:10.1039/d3tc02776g), 2023-11-29
Supplement: d3tc02776g1.pdf [file d3tc02776g1.pdf]

## **Electronic supplementary information**

### **Design of Cr-Ba-doped $\gamma$ -Ga<sub>2</sub>O<sub>3</sub> Persistent Luminescence**

### **Nanoparticles for Ratiometric Temperature Sensing and Encryption**

### **Information Transfer**

Tianqi Zhao<sup>a, b</sup>, Renagul Abdurahman<sup>b,\*</sup>, Qianting Yang<sup>b</sup>, Ruxiangul Aiwaili<sup>b</sup>, Xue-Bo Yin<sup>a, \*</sup>

a. Institute for Frontier Medical Technology, College of Chemistry and Chemical Engineering, Shanghai University of Engineering Science, Shanghai, 201620 China.

\*E-mail: xbyin@nankai.edu.cn, xbyin@sues.edu.cn

b. Key Laboratory of Xinjiang Novel Functional Materials Chemistry; Laboratory of Xinjiang Native Medicinal and Edible Plant Resources Chemistry, College of Chemistry and Environmental Science, Kashi University, Kashi Xinjiang, 844000 China.

\*E-mail: renagull111@aliyun.com

**Table S1** Solution volume compositions of different samples

| Samples | V <sub>Ga</sub> / mL | V <sub>Ethylene glycol</sub> / mL | V <sub>Cr</sub> / mL | V <sub>Ba</sub> / mL |
|---------|----------------------|-----------------------------------|----------------------|----------------------|
| 1       | 4                    | 2                                 | 0                    | 0                    |
| 2       | 4                    | 2                                 | 0.05                 | 0                    |
| 3       | 4                    | 2                                 | 0.10                 | 0                    |
| 4       | 4                    | 2                                 | 0.15                 | 0                    |
| 5       | 4                    | 2                                 | 0.20                 | 0                    |
| 6       | 4                    | 2                                 | 0.25                 | 0                    |
| 7       | 4                    | 2                                 | 0.30                 | 0                    |
| 8       | 4                    | 2                                 | 0.25                 | 0                    |
| 9       | 4                    | 2                                 | 0.25                 | 0.08                 |
| 10      | 4                    | 2                                 | 0.25                 | 0.12                 |
| 11      | 4                    | 2                                 | 0.25                 | 0.16                 |

**Note:** C<sub>Ga</sub>=0.5 mol·L<sup>-1</sup>; C<sub>Cr</sub>=0.01 mol·L<sup>-1</sup>; C<sub>Ba</sub>=0.01 mol·L<sup>-1</sup>; n<sub>Ga2O3</sub> : n<sub>Cr</sub> : n<sub>Ba</sub>=1 : x : y

**Table S2** The result of  $\gamma$ GCB XRD refinement

| Samples                              | $\gamma$ GCB |
|--------------------------------------|--------------|
| Space group                          | <i>Fd3m</i>  |
| $2\theta$ -interval (°)              | 10-80        |
| <i>a</i> (Å)                         | 8.224        |
| <i>b</i> (Å)                         | 8.224        |
| <i>c</i> (Å)                         | 8.224        |
| Alpha                                | 90.00        |
| Beta                                 | 90.00        |
| Gamma                                | 90.00        |
| Crystal density (g/cm <sup>3</sup> ) | 5.97         |
| <i>V</i> (Å <sup>3</sup> )           | 556.15       |
| <i>R</i> <sub>wp</sub> (%)           | 7.21         |
| <i>R</i> <sub>p</sub> (%)            | 5.72         |
| $\chi^2$                             | 1.88         |
| <i>GOF</i>                           | 1.37         |

**Table S3** Fitting parameters of  $\gamma$ -Ga<sub>2</sub>O<sub>3</sub>: 0.0025Cr and  $\gamma$ GCB decay curve

| Parameters    | $\gamma$ -Ga <sub>2</sub> O <sub>3</sub> : 0.0025Cr | $\gamma$ GCB |
|---------------|-----------------------------------------------------|--------------|
| $\tau_1/s$    | 3.084                                               | 4.661        |
| $A_1$         | 1.608                                               | 1.400        |
| $\tau_2/s$    | 44.471                                              | 62.014       |
| $A_2$         | 1.005                                               | 0.888        |
| $\tau_3/s$    | 421.608                                             | 509.628      |
| $A_3$         | 1.145                                               | 1.185        |
| $\tau_{av}/s$ | 141.670                                             | 191.560      |
| $R^2$         | 0.996                                               | 0.997        |

**Table S4** Comparison of LIR-based materials for temperature sensing

| Material composition                                                                                                 | Temperature range/ K | $S_a$ (%K <sup>-1</sup> ) | $S_r$ (%K <sup>-1</sup> ) | Reference |
|----------------------------------------------------------------------------------------------------------------------|----------------------|---------------------------|---------------------------|-----------|
| NaYF <sub>4</sub> : Er <sup>3+</sup>                                                                                 | 303-423              | -                         | 1.06 (303K)               | 1         |
| Na <sub>5</sub> Y <sub>9</sub> F <sub>32</sub> : Ce <sup>3+</sup> , Tb <sup>3+</sup>                                 | 298-473              | 1.57                      | 1.18 (473K)               | 2         |
| Ba <sub>2</sub> LaTaO <sub>6</sub> : Bi <sup>3+</sup> , Mn <sup>4+</sup>                                             | 80-473               | 2.91 (350K)               | 3.81 (350K)               | 3         |
| Sr <sub>2</sub> Y <sub>8</sub> (SiO <sub>4</sub> ) <sub>6</sub> O <sub>2</sub> : Ce <sup>3+</sup> , Tb <sup>3+</sup> | 298-498              | -                         | 0.74 (298K)               | 4         |
| SrLu <sub>2</sub> O <sub>4</sub> : Bi <sup>3+</sup> , Eu <sup>3+</sup>                                               | 315-543              | 1.1 (543K)                | 0.87 (315K)               | 5         |
| $\gamma$ -Ga <sub>2</sub> O <sub>3</sub> : Cr <sup>3+</sup> , Ba <sup>2+</sup>                                       | 300-420              | 3.4                       | 1.5 (300K)                | This work |

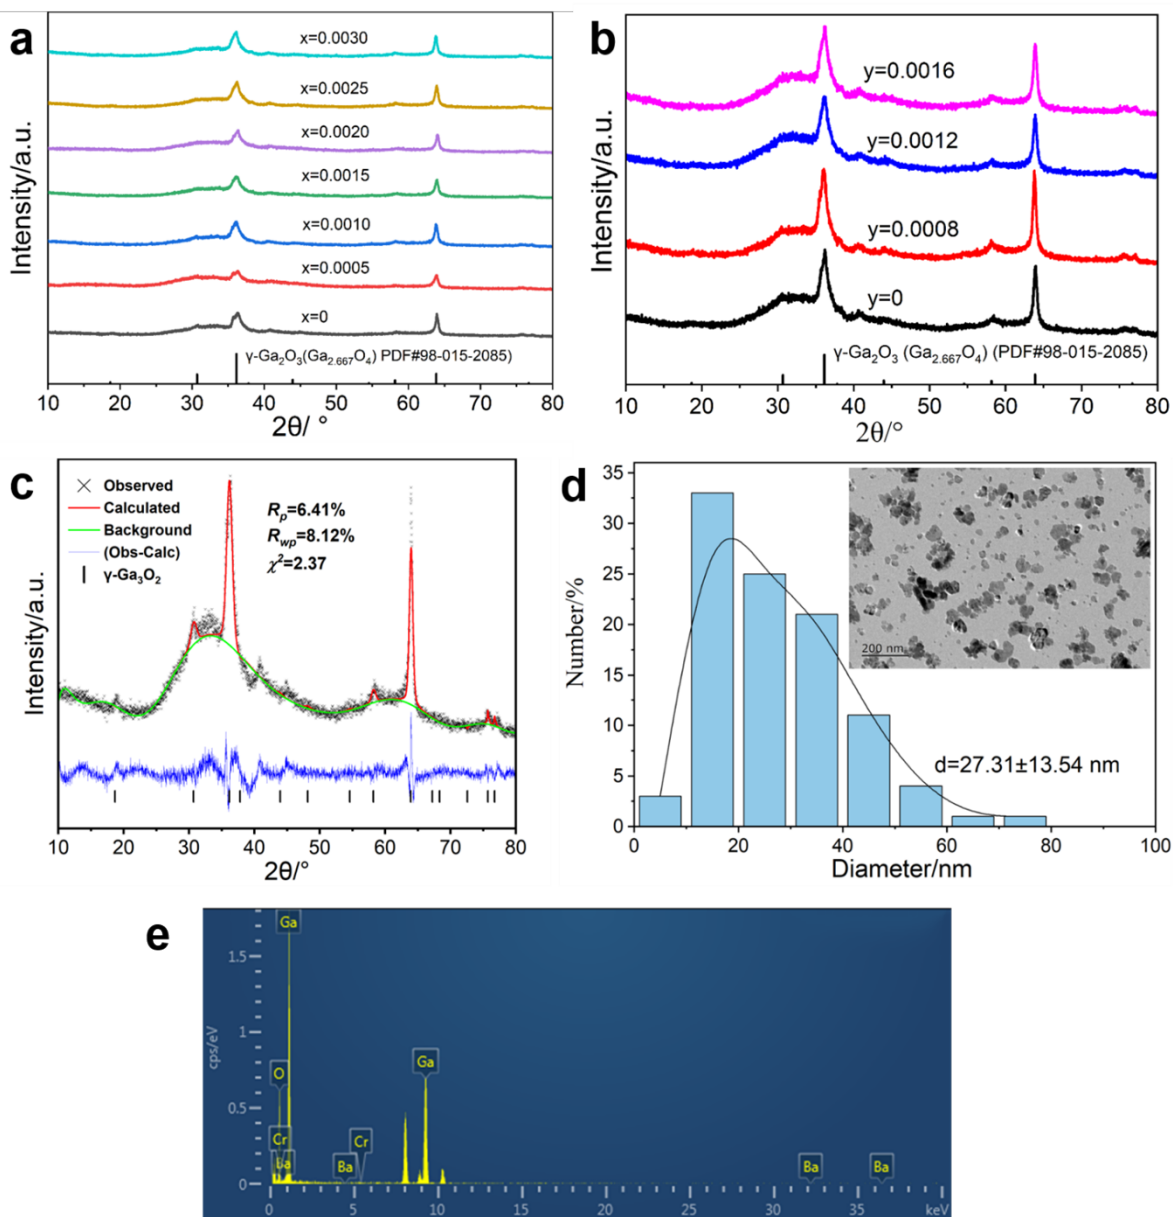

**Figure S1** The XRD pattern of a)  $\gamma$ -Ga<sub>2</sub>O<sub>3</sub>: xCr and b)  $\gamma$ -Ga<sub>2</sub>O<sub>3</sub>: 0.0025Cr, yBa. c) The XRD refined pattern of  $\gamma$ -Ga<sub>2</sub>O<sub>3</sub> using GSAS software. d) Particle size distribution and TEM pattern (insert) of  $\gamma$ -Ga<sub>2</sub>O<sub>3</sub>: 0.0025Cr. e) EDS spectrogram pattern of  $\gamma$ GCB.

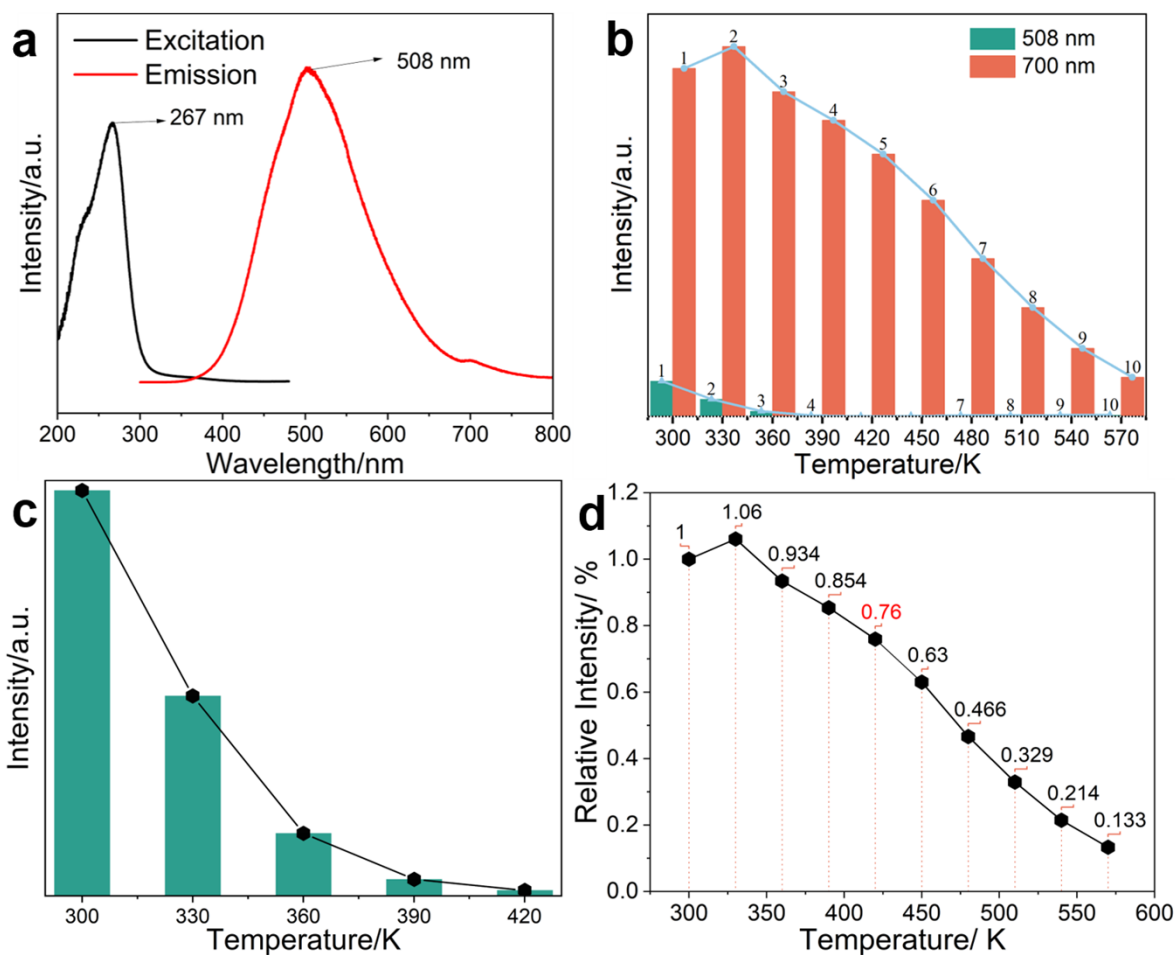

**Figure S2** a) Excitation spectrum of  $\gamma\text{-Ga}_2\text{O}_3$  with the emission at 508 nm and emission spectrum of  $\gamma\text{-Ga}_2\text{O}_3$  under 278 nm excitation. b) Luminescence intensity histogram at 508 nm and 700 nm of  $\gamma\text{GCB}$  at temperature from 300 to 570 K. c) Luminescence intensity histogram at 508 nm of  $\gamma\text{GCB}$  at temperature from 300 to 420 K. d) Linear between relative emission intensity and the temperature from 300 to 570 K.

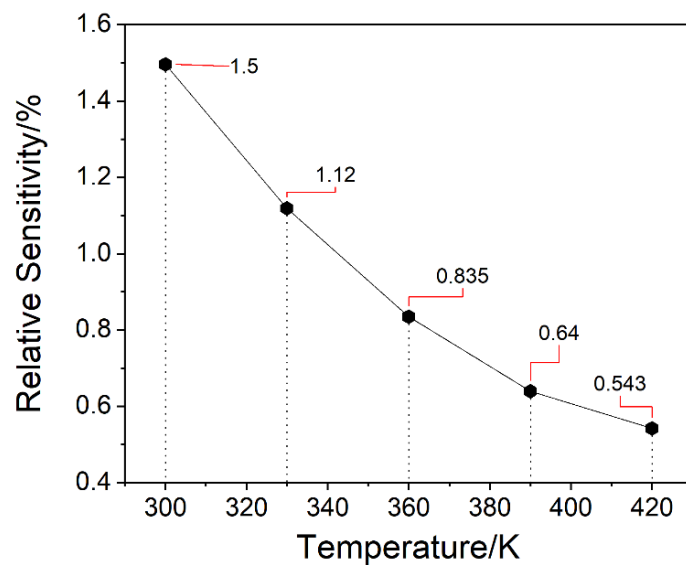

**Figure S3** Relative sensitivity of  $\gamma$ GCB in the temperature range 300-420K.

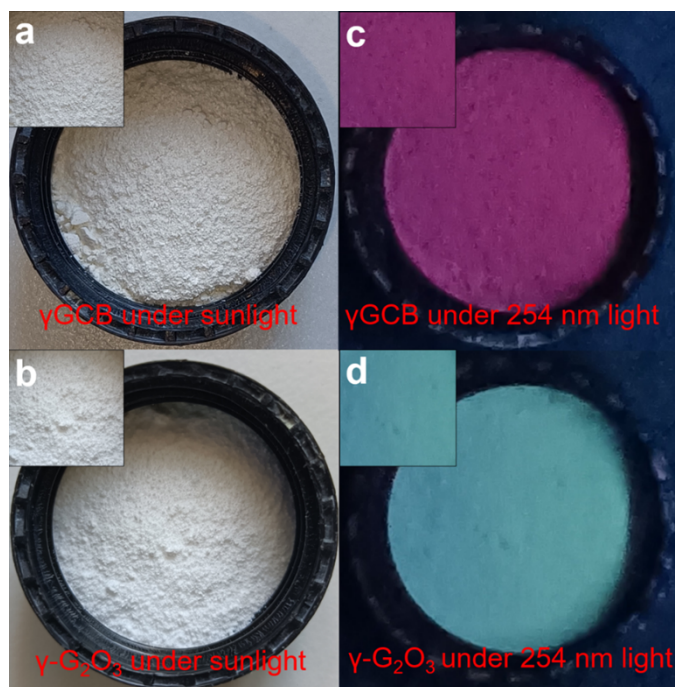

**Figure S4** The photographs of  $\gamma$ GCB and  $\gamma$ - $\text{Ga}_2\text{O}_3$  powder taken under a) and b) sunlight as well as c) and d) under 254 nm UV lamps.

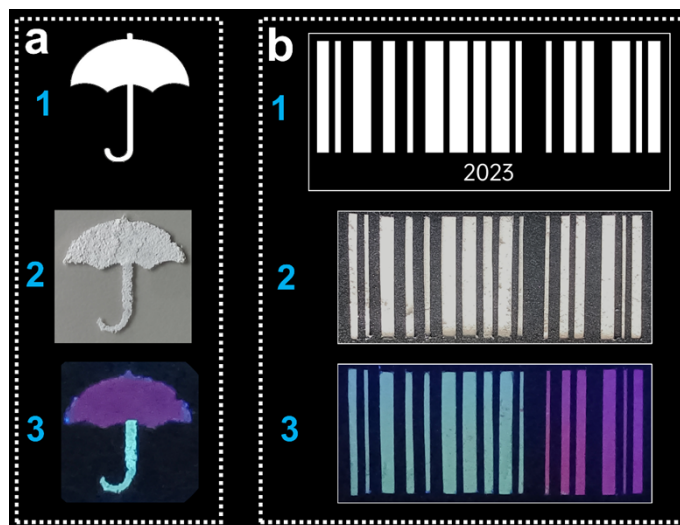

**Figure S5** The differentiation of a) umbrella pattern and b) barcode with the different color from  $\gamma$ GCB and  $\gamma$ -G<sub>2</sub>O<sub>3</sub> under the excitation with sunlight and 254 nm 1, 2, and 3 represent the designed pattern, and that under sunlight and 254 nm UV lamp, respectively.

## References

1. Z. Wu, L. Li, X. Lv, H. Suo, C. Cai, P. Lv, M. Ma, X. Shi, Y. Yang, L. Marciniak and J. Qiu, *Chem. Eng. J.*, 2022, **438**, 135573.
2. F. Xu, B. Zheng, H. Xia, J. Wang, H. Song and B. Chen, *J. Alloys Compd.*, 2021, **873**, 159790.
3. X. Zhu, L. Wang, Q. Shi, H. Guo, J. Qiao, C. e. Cui, K. V. Ivanovskikh and P. Huang, *J. Lumin.*, 2023, **262**, 119949.
4. W. Chun-Hao, J. Hao, Y. Zi-Han, W. Qing-Yang and L. Fa-Chun, *J. Alloys Compd.*, 2022, **928**, 167239.
5. X. Chen, Z. Zheng, L. Teng, R. Wei, F. Hu and H. Guo, *RSC Adv.*, 2018, **8**, 35422-35428.
